# Supplementary material for: A genome-wide association study of imaging-defined atherosclerosis
Source: Springer Nature journal article supplement (doi:10.1038/s41467-025-57457-7), 2025-03-31

## Supplementary Information

### A genome-wide association study of imaging-defined atherosclerosis

Anders Gummesson<sup>a, b</sup>, Per Lundmark<sup>c</sup>, Qiao Sen Chen<sup>d</sup>, Elias Björnson<sup>b</sup>, Koen F. Dekkers<sup>c</sup>, Ulf Hammar<sup>c</sup>, Martin Adiels<sup>e</sup>, Yunzhang Wang<sup>f</sup>, Therese Andersson<sup>g</sup>, Göran Bergström<sup>b, h</sup>, Carl-Johan Carlhäll<sup>i, j, k</sup>, David Erlinge<sup>l</sup>, Tomas Jernberg<sup>f</sup>, Fredrik Landfors<sup>g</sup>, Lars Lind<sup>m</sup>, Maria Mannila<sup>n</sup>, Olle Melander<sup>o, p</sup>, Carlo Pirazzi<sup>q</sup>, Johan Sundström<sup>r, s</sup>, Carl Johan Östgren<sup>i, k</sup>, Cecilia Gunnarsson<sup>t</sup>, Marju Orho-Melander<sup>o</sup>, Stefan Söderberg<sup>g</sup>, Tove Fall<sup>c</sup>, Bruna Gigante<sup>d, u</sup>

<sup>a</sup>Region Västra Götaland, Sahlgrenska University Hospital, Department of Clinical Genetics and Genomics, Gothenburg, Sweden

<sup>b</sup>Department of Molecular and Clinical Medicine, Institute of Medicine, Sahlgrenska Academy, University of Gothenburg, Gothenburg, Sweden

<sup>c</sup>Department of Medical Sciences, Molecular Epidemiology, Uppsala University, Uppsala, Sweden

<sup>d</sup>Division of Cardiology, Department of Medicine, Karolinska Institutet, Stockholm, Sweden

<sup>e</sup>School of Public Health and Community Medicine, Institute of Medicine, University of Gothenburg, Gothenburg, Sweden

<sup>f</sup>Department of Clinical Sciences, Danderyd University Hospital, Karolinska Institutet, Stockholm, Sweden

<sup>g</sup>Department of Public Medicine and Clinical Health, Umeå University, Umeå, Sweden

<sup>h</sup>Region Västra Götaland, Sahlgrenska University Hospital, Department of Clinical Physiology, Gothenburg, Sweden

<sup>i</sup>Center for Medical Image Science and Visualization (CMIV), Linköping University, Linköping, Sweden

<sup>j</sup>Department of Clinical Physiology in Linköping, Linköping University, Linköping, Sweden

<sup>k</sup>Department of Health, Medicine and Caring Sciences, Linköping University, Linköping, Sweden

<sup>l</sup>Department of Clinical Sciences Lund, Cardiology, Lund University, Sweden

<sup>m</sup>Department of Medical Sciences, Clinical Epidemiology, Uppsala University, Uppsala, Sweden

<sup>n</sup>Department of Cardiology, Karolinska University Hospital, Stockholm, Sweden

<sup>o</sup>Department of Clinical Sciences in Malmö, Lund University, Malmö, Sweden

<sup>p</sup>Department of Emergency and Internal Medicine, Skåne University Hospital, Malmö, Sweden

<sup>q</sup>Region Västra Götaland, Sahlgrenska University Hospital, Department of Cardiology, Gothenburg, Sweden

<sup>r</sup>Department of Medical Sciences, Uppsala University, Uppsala, Sweden

<sup>s</sup>The George Institute for Global Health, University of New South Wales, Sydney, Australia

<sup>t</sup>Department of Biomedical and Clinical Sciences, Division of Clinical Genetics, Linköping University, Linköping, Sweden

<sup>u</sup>Department of Cardiology, Karolinska University Hospital, Stockholm, Sweden

### Abbreviations:

CACS, coronary artery calcification score; CarPlaq, carotid plaque; CCTA, coronary computed tomography angiography; CT, computed tomography; eQTLs, expression quantitative trait loci; GWAS, genome-wide association study; LD, linkage disequilibrium; SCAPIS, Swedish CARDioPulmonary bioImage Study; SD, standard deviation; SIS, segment involvement score; SNP, single nucleotide polymorphism; SuSiE, Sum of Single Effects.

**Supplementary Table S1. Characteristics of the SCAPIS study participants of European ancestry with imputed genotypes included in the present study.**

Numbers are presented as mean (SD) or n (%).

|                                                 |               |
|-------------------------------------------------|---------------|
| n                                               | 27010         |
| Males                                           | 13110 (48.5%) |
| Age, years                                      | 57.6 (4.4)    |
| Current smoker                                  | 3156 (12.1%)  |
| Heredity for MI                                 | 1822 (6.9%)   |
| <b>Body composition</b>                         |               |
| Body mass index, kg/m <sup>2</sup>              | 26.9 (4.5)    |
| Waist circumference, cm                         | 94.4 (13.0)   |
| <b>Blood pressure</b>                           |               |
| Hypertension diagnosis                          | 6012 (23.0%)  |
| Systolic blood pressure, mmHg                   | 126.2 (17.0)  |
| Diastolic blood pressure, mmHg                  | 77.7 (10.6)   |
| <b>Glycemic status</b>                          |               |
| Diabetes diagnosis                              | 1901 (7.0%)   |
| Glucose, mmol/L                                 | 5.76 (1.10)   |
| Haemoglobin A1c, mmol/mol                       | 36.4 (6.2)    |
| <b>Lipid status</b>                             |               |
| Lipid-lowering medication                       | 2059 (7.9%)   |
| Low density lipoprotein cholesterol, mmol/L     | 3.45 (0.96)   |
| High density lipoprotein cholesterol, mmol/L    | 1.64 (0.50)   |
| Triglycerides, mmol/L                           | 1.23 (0.83)   |
| Lipoprotein(a), mg/dL                           | 0.22 (0.27)   |
| <b>Imaging-defined atherosclerosis</b>          |               |
| Any coronary plaque on CCTA (SIS > 0)           | 10589 (42.7%) |
| SIS 1-3                                         | 7476 (30.1%)  |
| SIS 4-6                                         | 2221 (9.0%)   |
| SIS 7-11                                        | 892 (3.6%)    |
| At least one coronary vessel with >50% stenosis | 1413 (5.7%)   |
| Any coronary calcification on CT (CACS > 0)     | 10645 (40.9%) |
| CACS 1-100                                      | 7460 (28.7%)  |
| CACS 101-400                                    | 2164 (8.3%)   |
| CACS >400                                       | 1021 (3.9%)   |
| Any carotid plaque on ultrasound (CarPlaq > 0)  | 14813 (55.3%) |
| Unilateral (CarPlaq = 1)                        | 7944 (29.6%)  |
| Bilateral (CarPlaq = 2)                         | 6869 (25.6%)  |

**Supplementary Table S2. Extended gene annotations for all significant independent SNPs associated with either SIS, CACS or CarPlaq.**

Annotation from Open Targets (<https://www.opentargets.org/>) refers to the gene with the highest score for being functionally implicated by each variant. GTEx expression quantitative trait loci (eQTL) are those significant in coronary, aortic or tibial artery tissue in the GTEx database version 8 (<https://www.gtexportal.org/home/>), with maximum three shown (lowest p-value, 2-sided). STARNET eQTLs are those significant in atherosclerotic aortic root (<http://starnet.mssm.edu/>), with maximum three shown (lowest p-value, 2-sided).

| SNP         | Gene(s)              | Consequence    | Nearest protein-coding gene | Open Targets gene | GTEx eQTL (artery)           | STARNET eQTL (atherosclerotic aortic root) |
|-------------|----------------------|----------------|-----------------------------|-------------------|------------------------------|--------------------------------------------|
| rs17127656  | LEPR                 | Intronic       | LEPR                        | LEPR              |                              |                                            |
| rs1909197   | MIA3                 | Intronic       | MIA3                        | MIA3              | MIA3, AIDA                   | TAF1A                                      |
| rs78049276  | EDNRA                | Intronic       | EDNRA                       | EDNRA             |                              | EDNRA                                      |
| rs12190315  | LINC01600            | ncRNA_intronic | MYLK4                       | MYLK4             | LINC01600                    |                                            |
| rs9349379   | PHACTR1              | Intronic       | PHACTR1                     | PHACTR1           | PHACTR1, GFOD1, LOC100130357 | PHACTR1, GFOD1                             |
| rs9268807   | HLA-DRA, HLA-DRB5    | Intergenic     | HLA-DRA                     | HLA-DRB5          | HLA-DRB5, HLA-DQB2, HLA-DQA1 | HLA-DRB6                                   |
| rs1578654   | LINC02542            | ncRNA_intronic | IBTK                        | TENT5A            |                              |                                            |
| rs74617384  | LPA                  | Intronic       | LPA                         | SLC22A3           |                              |                                            |
| rs10455872  | LPA                  | Intronic       | LPA                         | SLC22A3           |                              |                                            |
| rs2315065   | LPA, PLG             | Intergenic     | PLG                         | PLG               |                              |                                            |
| rs186696265 | LPA, PLG             | Intergenic     | PLG                         | PLG               |                              |                                            |
| rs2074633   | HDAC9                | UTR3           | HDAC9                       | TWIST1            | TWIST1                       | TWIST1                                     |
| rs73225858  | BMP1                 | Intronic       | BMP1                        | BMP1              | BMP1, PHYHIP                 | BMP1, POLR3D, PHYHIP                       |
| rs2594811   | MRPL15, RNU105C      | Intergenic     | MRPL15                      |                   |                              |                                            |
| rs28601761  | TRIB1, LINC00861     | Intergenic     | TRIB1                       | TRIB1             |                              |                                            |
| rs1537370   | CDKN2B-AS1           | ncRNA_intronic | CDKN2B                      | CDKN2A            |                              | CDKN2B-AS1, CDKN2B                         |
| rs10738606  | CDKN2B-AS1           | ncRNA_intronic | CDKN2B                      | CDKN2A            |                              | CDKN2B-AS1, CDKN2B                         |
| rs4977575   | CDKN2B-AS1, DMRTA1   | Intergenic     | CDKN2B                      | CDKN2B            |                              | CDKN2B-AS1, CDKN2B                         |
| rs3891689   | ASTN2                | Intronic       | ASTN2                       | TRIM32            |                              |                                            |
| rs631414    | LINC00841, C10orf142 | Intergenic     | CXCL12                      | CXCL12            |                              |                                            |
| rs2000660   | LOC105370361, COL4A1 | Intergenic     | COL4A1                      | COL4A2            |                              |                                            |
| rs11617955  | COL4A1               | Intronic       | COL4A1                      | COL4A1            |                              |                                            |
| rs9515203   | COL4A2               | Intronic       | COL4A2                      | COL4A2            |                              | IRS2                                       |
| rs4243085   | ADAMTS7              | Intronic       | ADAMTS7                     | ADAMTS7           | ADAMTS7, ADAMTS7P3           | ADAMTS7                                    |
| rs7198873   | CFDP1, TMEM170A      | Intergenic     | TMEM170A                    | CFDP1             | BCAR1                        | BCAR1, TMEM170A                            |
| rs423984    | FOXL1, LINC02189     | Intergenic     | FOXL1                       | MTHFSD            | RP11-58A18.2, RP11-58A18.1   | LINC02188                                  |
| rs2088140   | IGF2BP1              | Intronic       | IGF2BP1                     | ATP5MC1           |                              | HOXB-AS1                                   |
| rs4423524   | KANK2                | UTR3           | KANK2                       |                   |                              |                                            |
| rs429358    | APOE                 | Exonic         | APOE                        | APOE              |                              |                                            |
| rs7412      | APOE                 | Exonic         | APOE                        | APOE              |                              | PPP1R13L                                   |
| rs9305545   | LINC00310, KCNE2     | Intergenic     | MRPS6                       | MRPS6             | MRPS6, LINC00310, SLC5A3     | SLC5A3, MRPS6, LINC00310                   |
| rs9980618   | LINC00310, KCNE2     | Intergenic     | MRPS6                       | MRPS6             | MRPS6, LINC00310, SLC5A3     | SLC5A3, MRPS6, LINC00310                   |

**Supplementary Table S3. Mendelian randomization results on the causal relationship between SIS and MI, including IVW (main analysis) and MR Egger.**

The analysis was based on the 20 significant independent SNPs for SIS in SCAPIS (n=24,811). Data on genetic associations with MI was obtained from UK Biobank (n=487,202). Statistical test for exposure-outcome relationship refer to the built-in test for each respective model in R-package MendelianRandomization. P-values are 2-sided and without adjustments for multiple comparisons

| Method                    | Odds Ratio | 95% CI |       | P-value   |
|---------------------------|------------|--------|-------|-----------|
| Simple median             | 1.77       | 1.59   | 1.97  | 4.84E-25  |
| Weighted median           | 1.85       | 1.69   | 2.03  | 5.16E-39  |
| Penalized weighted median | 1.85       | 1.69   | 2.04  | 8.02E-38  |
| IVW                       | 1.83       | 1.59   | 2.1   | 2.65E-17  |
| Penalized IVW             | 1.82       | 1.73   | 1.92  | 6.52E-108 |
| Robust IVW                | 1.8        | 1.57   | 2.06  | 5.26E-17  |
| Penalized robust IVW      | 1.84       | 1.75   | 1.94  | 1.84E-116 |
| MR-Egger                  | 2.52       | 1.89   | 3.37  | 3.00E-10  |
| (intercept)               | 0.952      | 0.916  | 0.99  | 0.015     |
| Penalized MR-Egger        | 2.29       | 1.8    | 2.92  | 1.93E-11  |
| (intercept)               | 0.963      | 0.936  | 0.991 | 0.010     |
| Robust MR-Egger           | 2.44       | 1.7    | 3.52  | 1.53E-06  |
| (intercept)               | 0.956      | 0.914  | 1     | 0.048     |
| Penalized robust MR-Egger | 2.23       | 1.78   | 2.8   | 3.60E-12  |
| (intercept)               | 0.967      | 0.936  | 1     | 0.049     |

### Supplementary Figure S1. Flowchart defining the GWAS population.

The grey box depicts the population described in Supplementary Table S1. SCAPIS, Swedish CARDioPulmonary bioImage Study; SD, standard deviation; GWAS, genome-wide association study; SIS, segment involvement score; CACS, coronary artery calcification score; CarPlaQ, carotid plaque. Age refers to mean  $\pm$ SD.

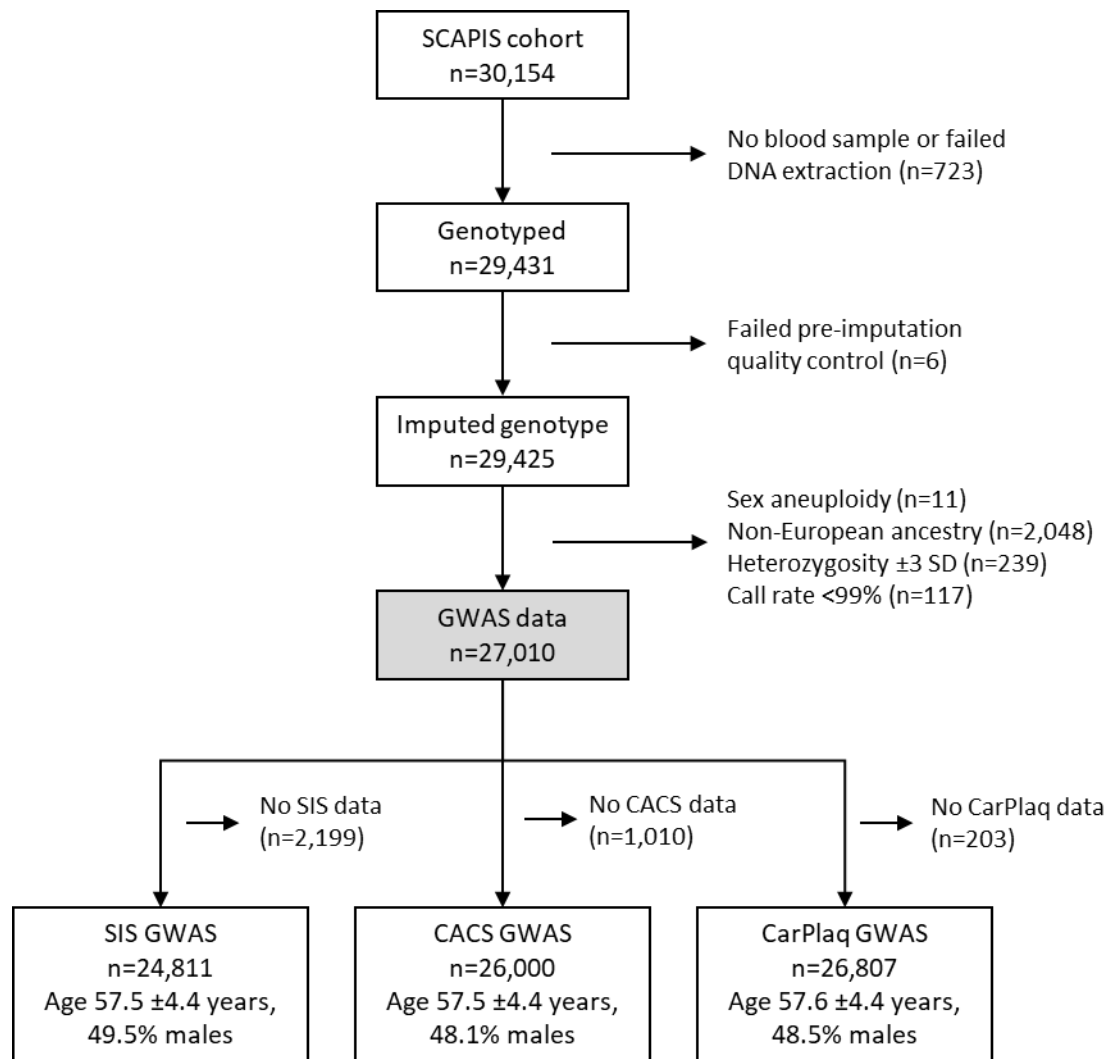

**Supplementary Figure S2. Beta coefficients in the genetic associations with the segment involvement score (SIS) compared to plaque localization and severity.**

The data are derived from GWAS of 24,811 SCAPIS participants.  $R^2$  values are derived from linear regression. Left anterior descending artery include segments 5, 6, 7, 9 and 17; Left circumflex artery includes segments 11, 12 and 13; Right coronary artery includes segments 1, 2 and 3. Proximal segments include 1, 5, 6 and 11; Distal segments include 2, 3, 7, 9, 12, 13 and 17. Any segment with >50% stenosis was used to define severe atherosclerosis in the bottom-right panel. Error bars represent standard errors. Source data are provided as a Source Data file.

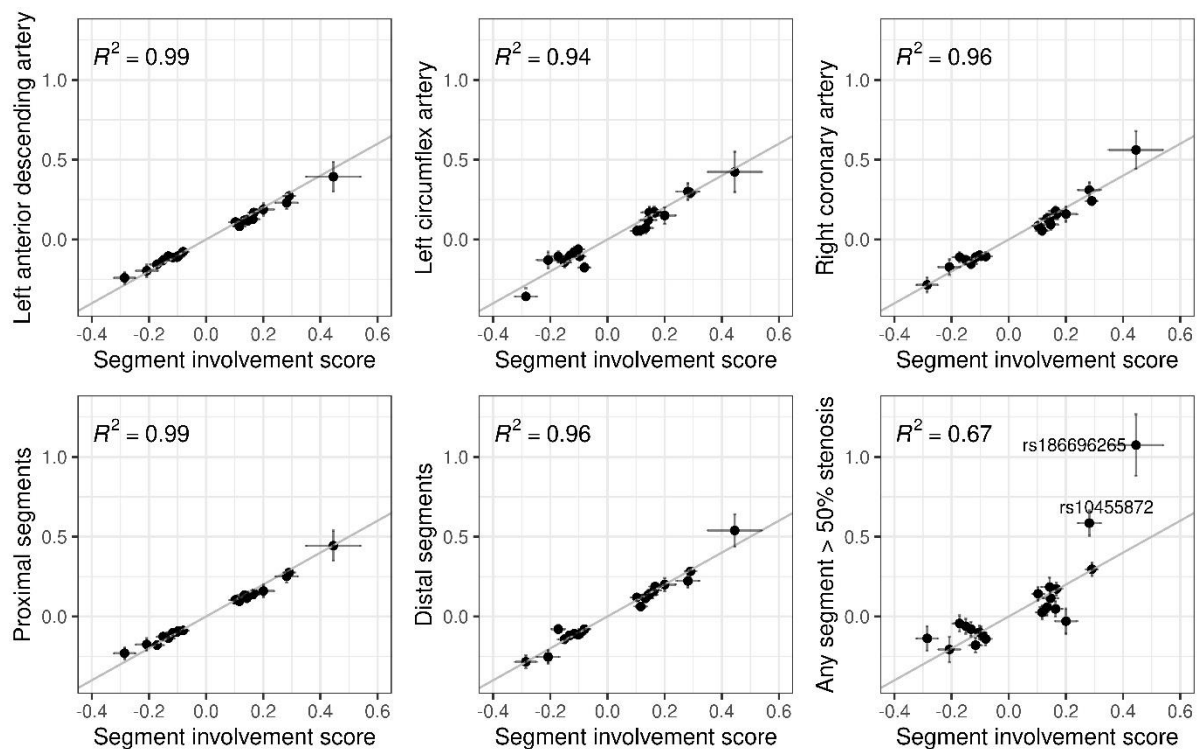

### Supplementary Figure S3. Scatter plot of the multivariate colocalization between SIS and CarPlaQ for rs10455872.

Genetic variants within a window of 250kb in the locus near rs10455872 were fine-mapped for each trait using SuSiE. In the scatter plot, one set of genetically colocalized SNPs between CarPlaQ (blue) and SIS (red) are identified as triangles marked by black circles. Enlarged points represent fine-mapped SNPs for each trait. Below the scatter plot, the middle panel displays a line plot showing the genes and region associated with each SNP. At the bottom, the triangular heatmap shows the LD structure for the surrounding region. Source data are provided as a Source Data file.

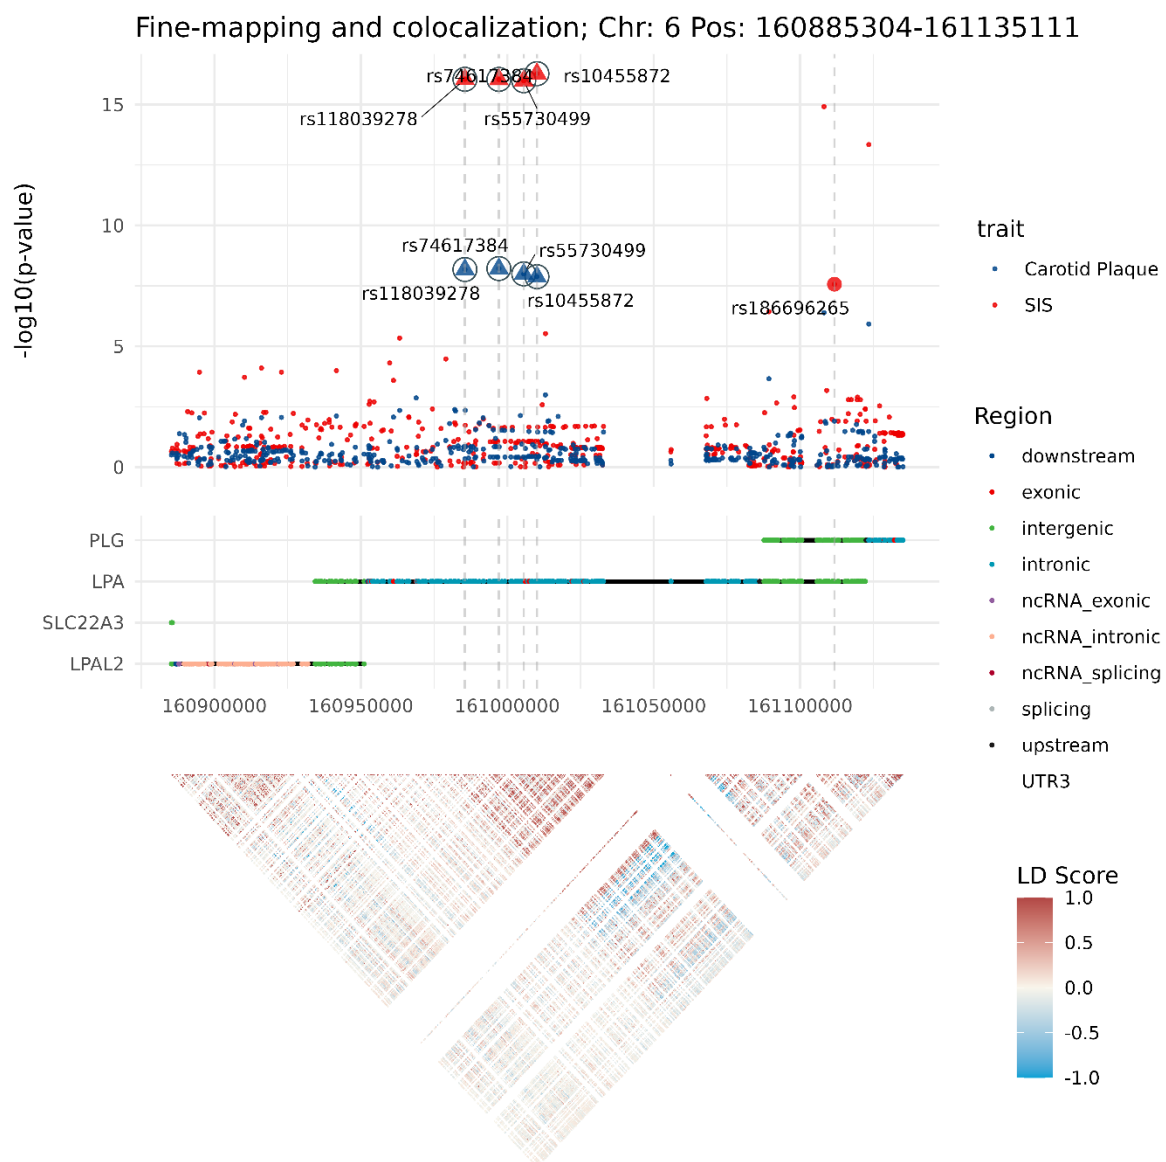

# Supplementary Figure S4. Scatter plot of the multivariate colocalization between SIS and CarPlaQ for rs186696265.

Genetic variants within a window of 250kb in the locus near rs186696265 were fine-mapped for each trait using SuSiE. In the scatter plot, one set of genetically colocalized SNPs between CarPlaQ (blue) and SIS (red) are identified as triangles marked by black circles. Enlarged points represent fine-mapped SNPs for each trait. Below the scatter plot, the middle panel displays a line plot showing the genes and region associated with each SNP. At the bottom, the triangular heatmap shows the LD structure for the surrounding region. Source data are provided as a Source Data file.

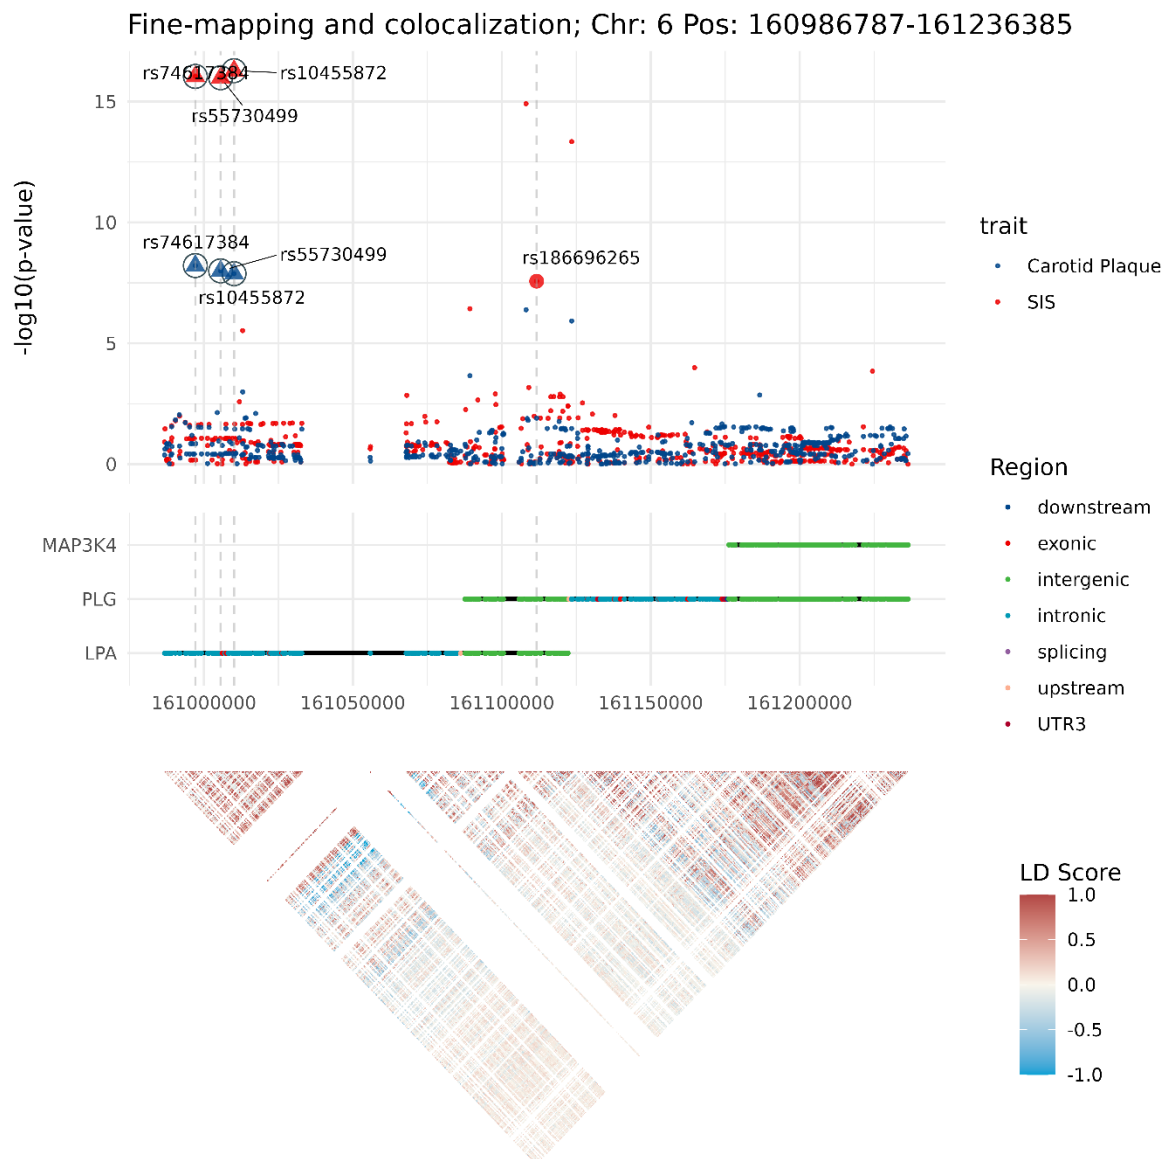



# **Supplementary Figure S5. Scatter plot of the multivariate colocalization between SIS and CarPlaQ for rs28601761.**

Genetic variants within a window of 250kb in the locus near rs28601761 were fine-mapped for each trait using SuSiE. In the scatter plot, one set of genetically colocalized SNPs between CarPlaQ (blue) and SIS (red) are identified as triangles marked by black circles. Enlarged points represent fine-mapped SNPs for each trait. Below the scatter plot, the middle panel displays a line plot showing the genes and region associated with each SNP. At the bottom, the triangular heatmap shows the LD structure for the surrounding region. Source data are provided as a Source Data file.

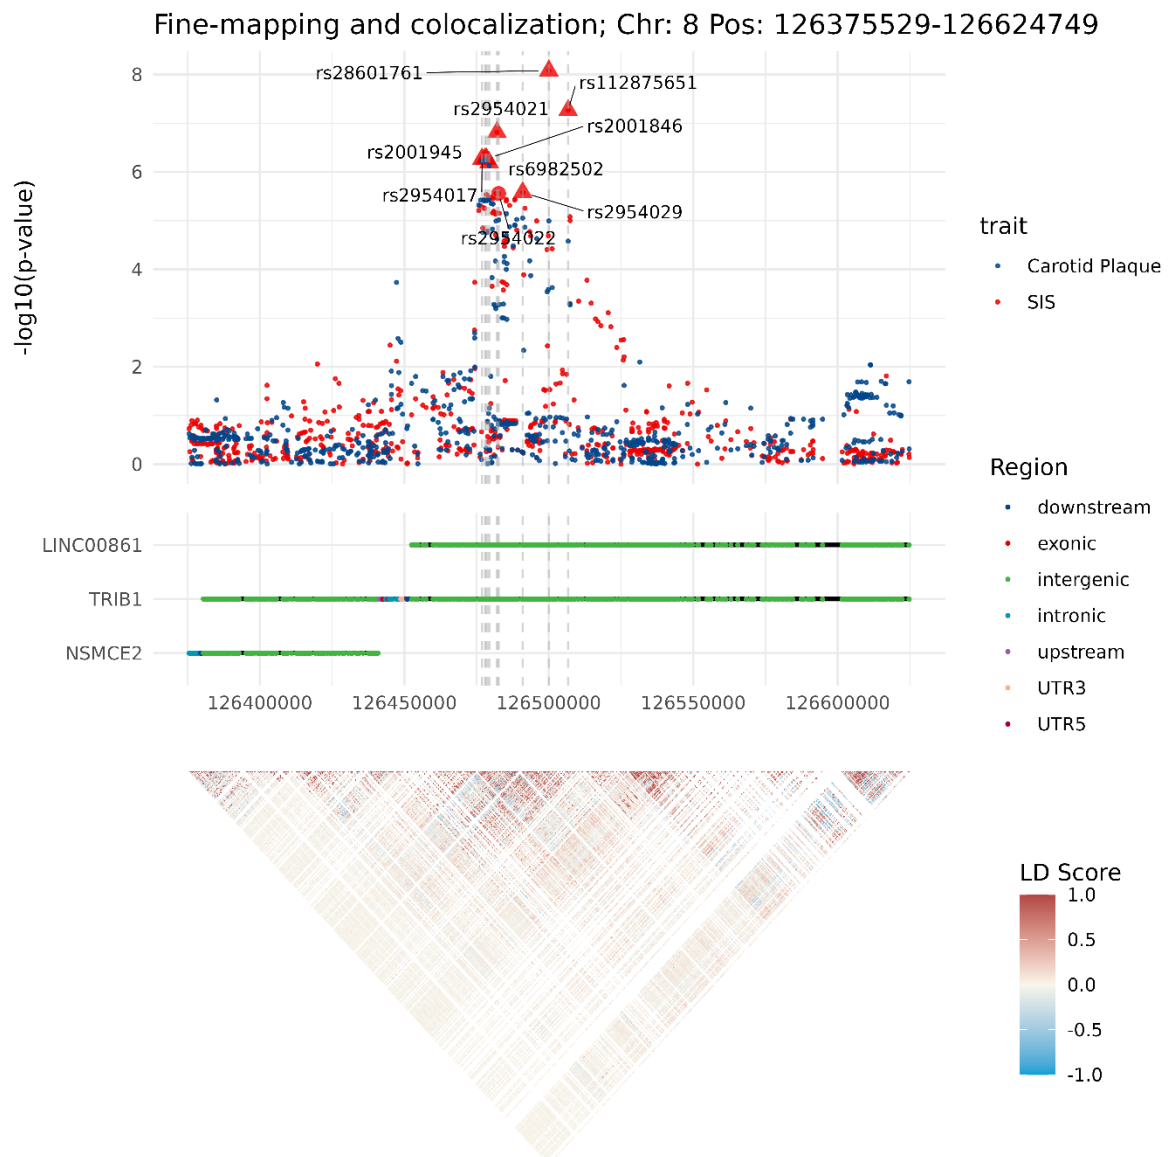

Genetic variants within a window of 250kb in the locus near rs4977575 were fine-mapped for each trait using SuSiE. In the scatter plot, one set of genetically colocalized SNPs between CarPlaq (blue) and SIS (red) are identified as triangles marked by black circles. Enlarged points represent fine-mapped SNPs for each trait. Below the scatter plot, the middle panel displays a line plot showing the genes and region associated with each SNP. At the bottom, the triangular heatmap shows the LD structure for the surrounding region. Source data are provided as a Source Data file.

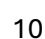

# Supplementary Figure S7. Scatter plot of the multivariate colocalization between SIS and CarPlaq for rs7412.

Genetic variants within a window of 250kb in the locus near rs7412 were fine-mapped for each trait using SuSiE. In the scatter plot, one set of genetically colocalized SNPs between CarPlaq (blue) and SIS (red) are identified as triangles marked by black circles. Enlarged points represent fine-mapped SNPs for each trait. Below the scatter plot, the middle panel displays a line plot showing the genes and region associated with each SNP. At the bottom, the triangular heatmap shows the LD structure for the surrounding region. Source data are provided as a Source Data file.

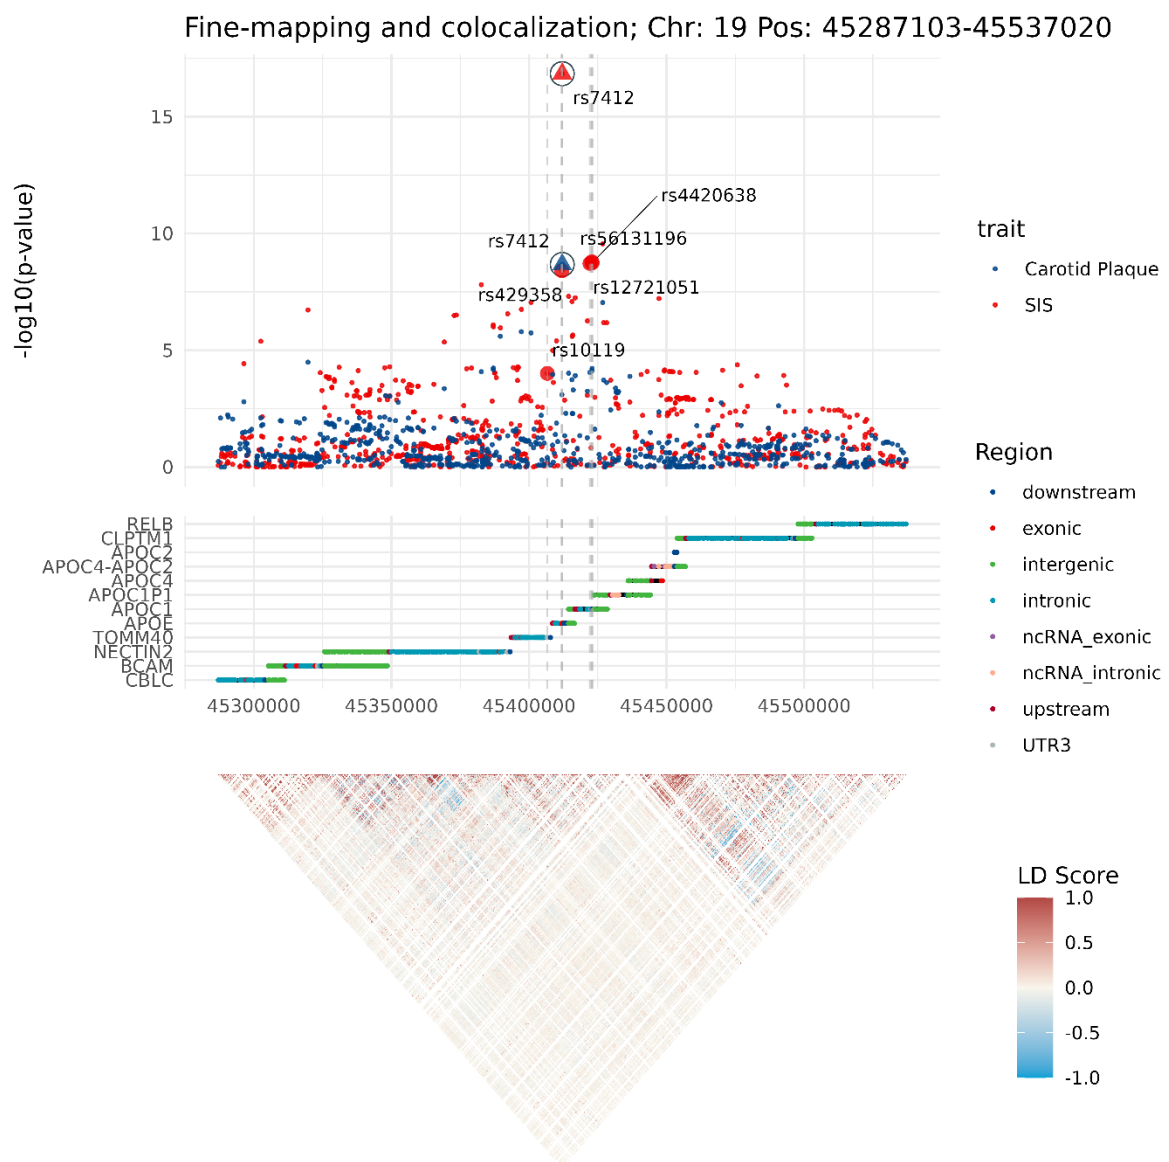

# Supplementary Figure S8. Scatter plot of the multivariate colocalization between CarPlaq and SIS for rs1537370.

Genetic variants within a window of 250kb in the locus near rs1537370 were fine-mapped for each trait using SuSiE. In the scatter plot, one set of genetically colocalized SNPs between CarPlaq (blue) and SIS (red) are identified as triangles marked by black circles. Enlarged points represent fine-mapped SNPs for each trait. Below the scatter plot, the middle panel displays a line plot showing the genes and region associated with each SNP. At the bottom, the triangular heatmap shows the LD structure for the surrounding region. Source data are provided as a Source Data file.

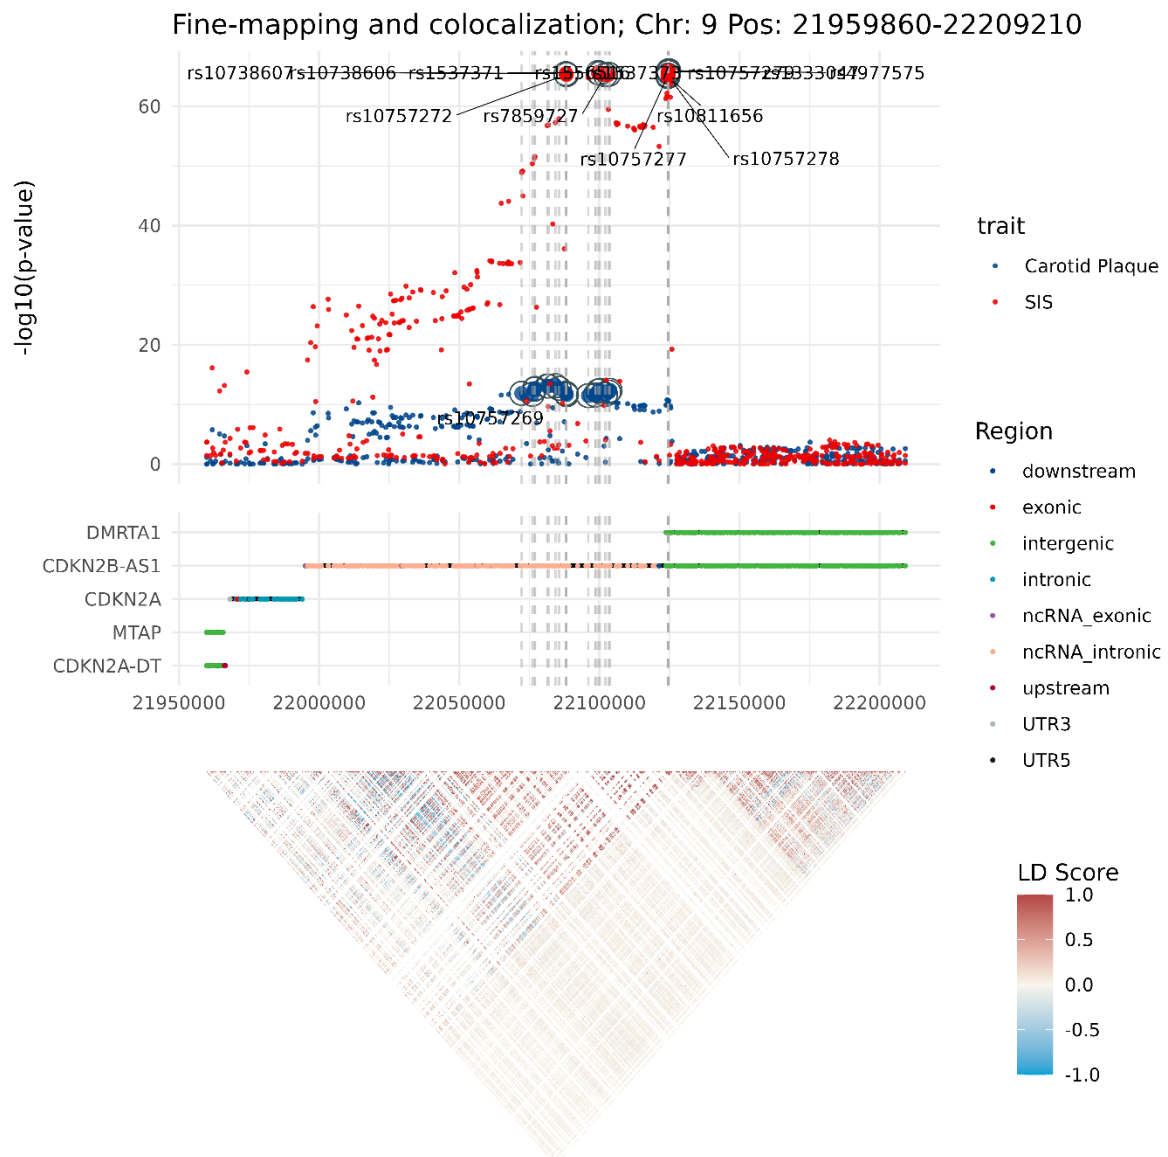

# Supplementary Figure S9. Scatter plot of the multivariant colocalization between CarPlaQ and SIS for rs7412.

Genetic variants within a window of 250kb in the locus near rs7412 were fine-mapped for each trait using SuSiE. In the scatter plot, one set of genetically colocalized SNPs between CarPlaQ (blue) and SIS (red) are identified as triangles marked by black circles. Enlarged points represent fine-mapped SNPs for each trait. Below the scatter plot, the middle panel displays a line plot showing the genes and region associated with each SNP. At the bottom, the triangular heatmap shows the LD structure for the surrounding region. Source data are provided as a Source Data file.

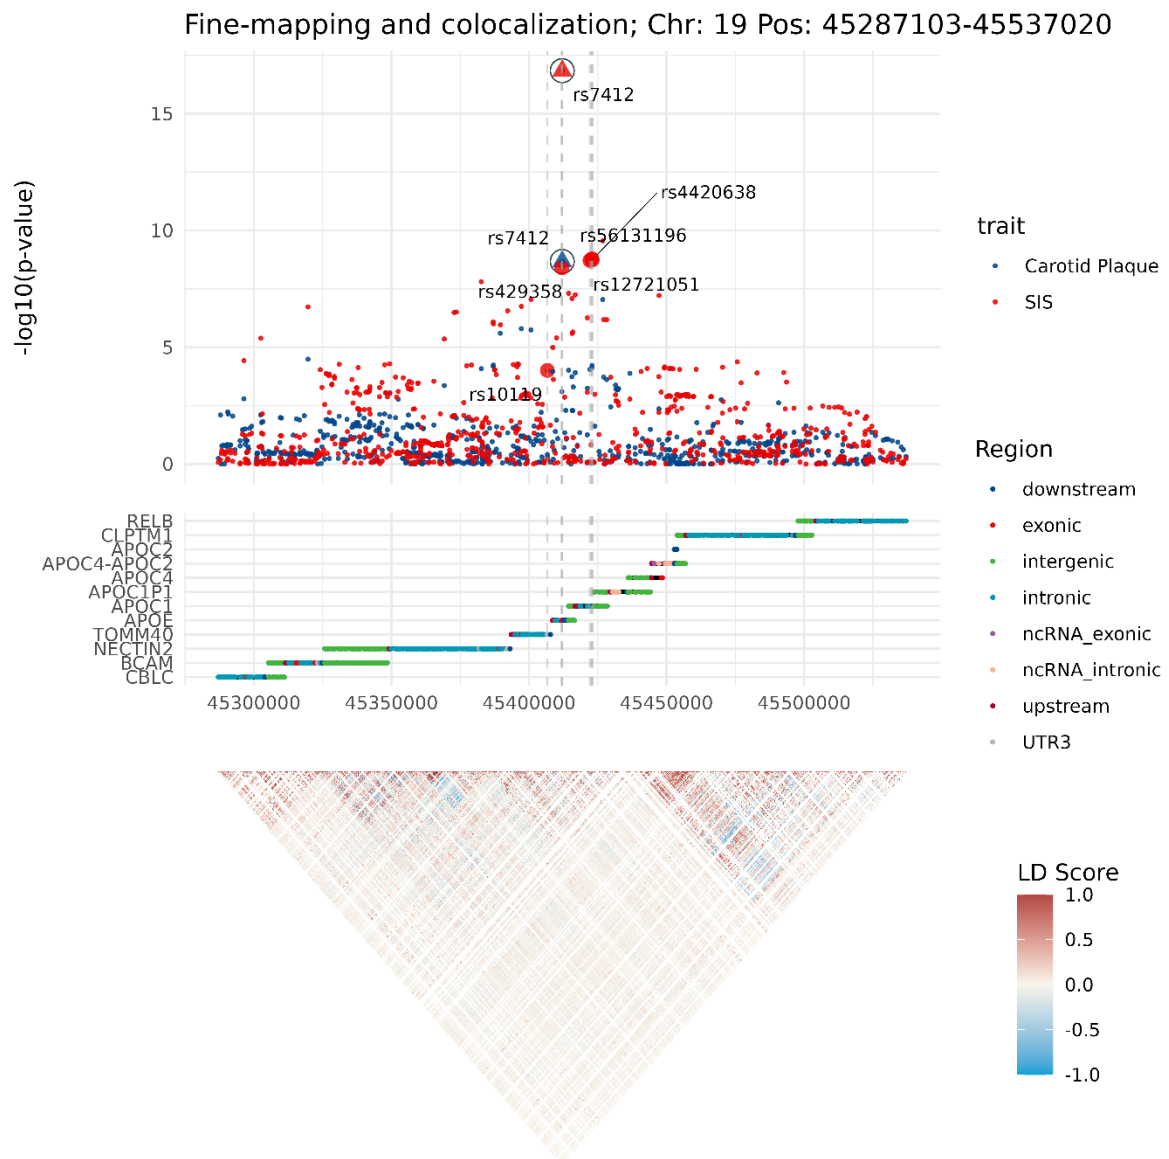

# Supplementary Figure S10. Scatter plot of the multivariate colocalization between CarPlaq and SIS for rs74617384.

Genetic variants within a window of 250kb in the locus near rs74617384 were fine-mapped for each trait using SuSiE. In the scatter plot, one set of genetically colocalized SNPs between CarPlaq (blue) and SIS (red) are identified as triangles marked by black circles. Enlarged points represent fine-mapped SNPs for each trait. Below the scatter plot, the middle panel displays a line plot showing the genes and region associated with each SNP. At the bottom, the triangular heatmap shows the LD structure for the surrounding region. Source data are provided as a Source Data file.

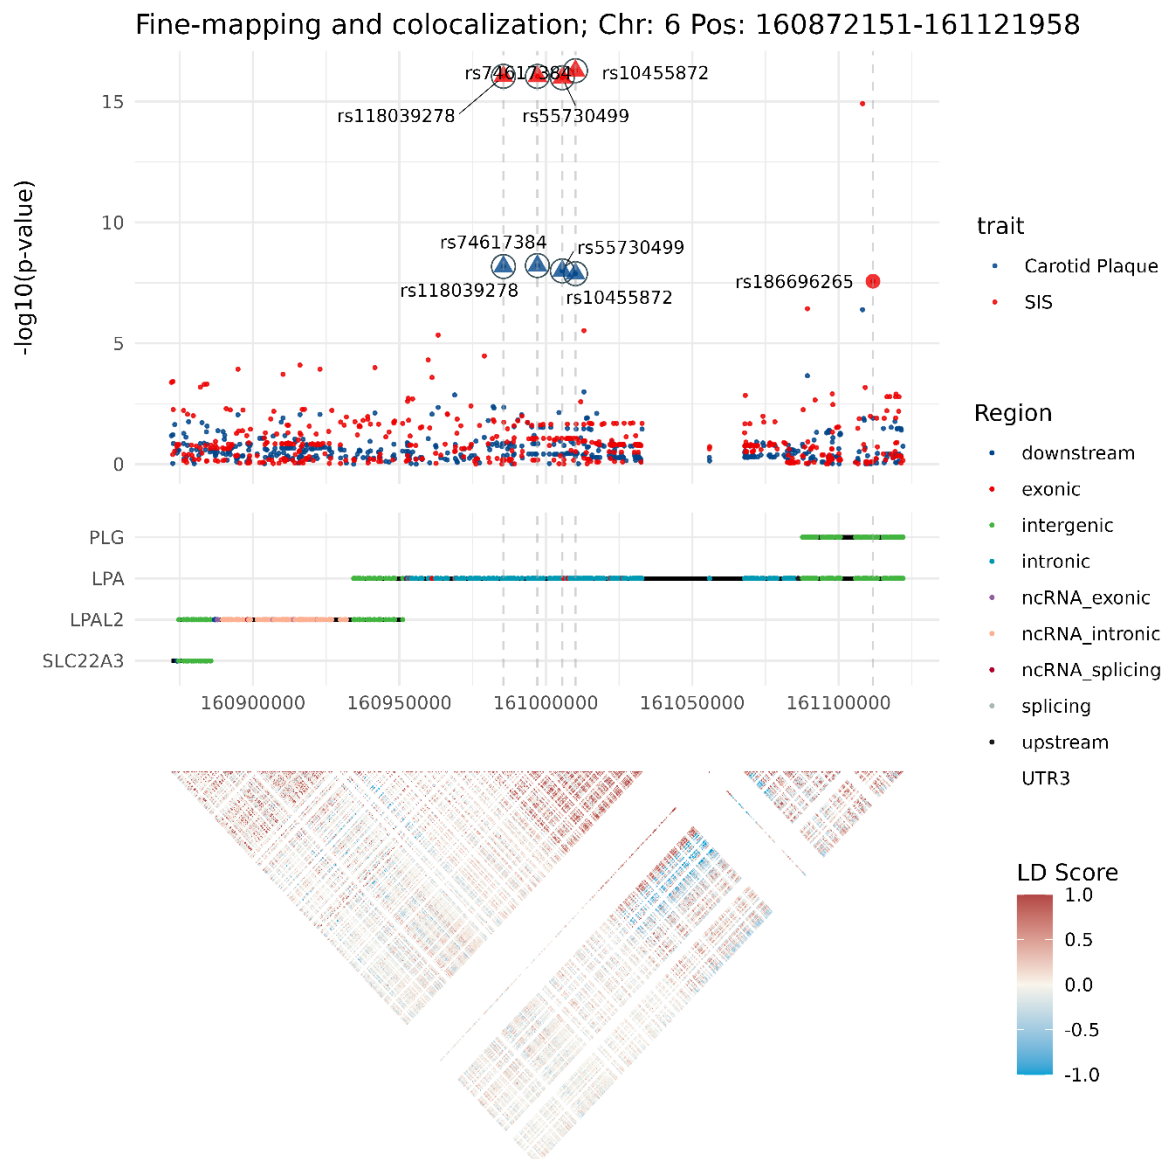

Supplement: MOESM1 [file 41467_2025_57457_MOESM1_ESM.pdf]
